# Supplementary material
Source: MDPI journal article supplement (https://www.mdpi.com/2036-7449/15/6/69)
Supplement: s1 [file s1]

**Supplementary Table S1:** Multiple logistic regression, variables that influence the reach of target undetected viemia. The model correctness was verified with Hosmer-Lemeshow test (value 5.6, p=0.6898).

| Variables                             | Odds ratio | 95% CI          |
|---------------------------------------|------------|-----------------|
| Zenith viremia cp/ml                  | 1.000      | 1.000 to 1.000  |
| CD4 nadir count, cell/mm <sup>3</sup> | 1.000      | 0.9988 to 1.002 |
| Years on BIC-STR                      | 1.643      | 1.038 to 2.660  |
| Age                                   | 0.9837     | 0.9511 to 1.016 |

*CI, confidence interval.*

**Supplementary Table S2:** Multiple logistic regression, variables that influence a good immunological recovery, defined as CD4+ T cell count > 500 cells/mm<sup>3</sup> in overall population. The model correctness was verified with Hosmer-Lemeshow test (value 8.6, p=0.3802).

| Variables                        |           | Odds ratio | 95% CI          |
|----------------------------------|-----------|------------|-----------------|
| Previous regimen                 | TAF-based | 2.642      | 1.235 to 5.787  |
| Zenith viremia, cp/ml            |           | 1.000      | 1.000 to 1.000  |
| CD4 nadir, cells/mm <sup>3</sup> |           | 1.006      | 1.004 to 1.009  |
| OI                               |           | 0.7488     | 0.3035 to 1.838 |
| HCV co-infection                 |           | 0.6101     | 0.2232 to 1.649 |
| Years on BIC-STR                 |           | 0.9008     | 0.5911 to 1.364 |
| Age                              |           | 0.9872     | 0.9562 to 1.019 |

*TAF, Tenofovir Alafenamide; OI, previous opportunistic infection; CI, confidence interval;*

**Supplementary Table S3:** Multiple logistic regression, variables that influence a good immunological recovery, defined as CD4 count > 500 cell/mm<sup>3</sup> patients aged over 60 years old. The model correctness was verified with Hosmer-Lemeshow test (value 8.7, p=0.3668).

| Variables                              |           |  | Odds ratio | 95% CI            |
|----------------------------------------|-----------|--|------------|-------------------|
| Previous regimen                       | TAF-based |  | 1.365      | 0.3032 to 6.080   |
| Zenith viremia, cp/ml                  |           |  | 1.000      | 1.000 to 1.000    |
| CD4 nadir count, cells/mm <sup>3</sup> |           |  | 1.003      | 0.9982 to 1.008   |
| Age                                    |           |  | 0.7879     | 0.6372 to 0.9386  |
| OI                                     |           |  | 0.1378     | 0.01913 to 0.7464 |

*TAF, Tenofovir Alafenamide; CI, confidence interval; OI, previous opportunistic infection*

### Causes of BIC-STR interruption

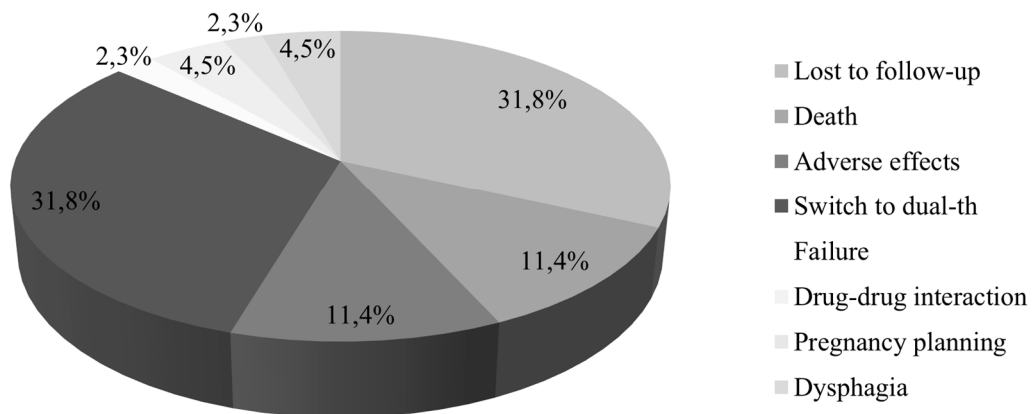

**Supplementary Figure S1:** Causes of bictegrovir/tenofovir alafenamide/emtricitabine interruption in 44 cases, expressed as percentage of total. *Dual-th, dual therapy.*
